# Supplementary material for: Effect of surgical experience and spine subspecialty on the reliability of the AO Spine Upper Cervical Injury Classification System
Source: PubMed Central journal article supplement — J Neurosurg Spine. 2022 Aug 19:2022.6.SPINE22454. doi: 10.3171/2022.6.SPINE22454 (PMC10193484; doi:10.3171/2022.6.spine22454), 2022-08-19
Supplement: SupplementalAppendixA_SPINE22-454.pdf [file SupplementalAppendixA_SPINE22-454.pdf]

**ONLINE ONLY**

## **Supplemental material**

### **Effect of surgical experience and spine subspecialty on the reliability of the AO Spine Upper Cervical Injury Classification System**

Lambrechts et al.

<https://thejns.org/doi/abs/10.3171/2022.6.SPINE22454>

**DISCLAIMER** The *Journal of Neurosurgery* acknowledges that the following section is published verbatim as submitted by the authors and did not go through either the *Journal's* peer-review or editing process.

Supplemental Appendix A: List of injuries evaluated by AO Spine members. Cases were randomized during both assessment one and two

| <b>AO Classification</b> | <b>Previous Classification</b>                             | <b>Description of Injury</b>                                                                                      |
|--------------------------|------------------------------------------------------------|-------------------------------------------------------------------------------------------------------------------|
| <b>IA</b>                | Anderson and Montesano type II                             | Simple midsubstance sagittal fracture of the occipital condyle                                                    |
| <b>IA</b>                | Anderson and Montesano type II                             | Simple sagittal fracture of the occipital condyle                                                                 |
| <b>IIA</b>               | Jefferson I / Gehweiler I                                  | Unilateral fracture of the anterior arch of the atlas                                                             |
| <b>IIA</b>               | Jefferson I / Gehweiler I                                  | Unilateral fracture of the anterior arch of the atlas                                                             |
| <b>IIA</b>               | Jefferson I / Gehweiler I                                  | Unilateral fracture of the anterior arch of the atlas                                                             |
| <b>IIA</b>               | Jefferson I / Gehweiler I                                  | Unilateral fracture of the anterior arch of the atlas                                                             |
| <b>IIIA</b>              | Anderson and D'Alonzo type II                              | Anterior to posterior oblique fracture of the dens                                                                |
| <b>IIIA</b>              | Anderson and D'Alonzo type II                              | Anterior to posterior oblique fracture of the dens                                                                |
| <b>IIIA</b>              | Anderson and D'Alonzo type III                             | Fracture of the cephalad C2 body below the watershed line of the dens                                             |
| <b>IIIA</b>              | Anderson and D'Alonzo type III                             | Posterior to anterior oblique fracture at the rostral C2 body                                                     |
| <b>IIB</b>               | Gehweiler III                                              | Unilateral avulsion fracture of the TAL from the atlas                                                            |
| <b>IIB</b>               | Gehweiler III                                              | Unilateral avulsion fracture of the TAL from the atlas                                                            |
| <b>IIB</b>               | Gehweiler III                                              | Unilateral avulsion fracture of the TAL from the atlas                                                            |
| <b>IIB</b>               | Gehweiler III/IV                                           | Unilateral avulsion fracture of the TAL with an associated lateral mass fracture without translation of the atlas |
| <b>IIIB</b>              | Benzel type I<br>Mechanism: extension with axial load      | Coronally oriented vertical C2 dens/body fracture                                                                 |
| <b>IIIB</b>              | Benzel type I<br>Mechanism: extension with axial load      | Coronally oriented vertical C2 dens/body fracture                                                                 |
| <b>IIIB</b>              | Extension teardrop                                         | Avulsion fracture of the ALL from the dens                                                                        |
| <b>IC</b>                | Traynellis I /Harbourview III                              | Anterior dislocation of the craniocervical junction                                                               |
| <b>IC</b>                | Traynellis I /Harbourview III                              | Anterior dislocation of the craniocervical junction                                                               |
| <b>IIC</b>               | C1-C2 dislocation                                          | Vertical distraction of the C1-C2 joint                                                                           |
| <b>IIC</b>               | C1-C2 dislocation                                          | Posterior translation of the C1-C2 joint                                                                          |
| <b>IIIC</b>              | Benzel type I<br>Mechanism: hyperextension with axial load | Avulsion fracture of the PLL with anterior disc space opening of C2                                               |
| <b>IIIC</b>              | Benzel type I<br>Mechanism: hyperextension with axial load | Extension teardrop with posterior translation of C2 on C3                                                         |
| <b>IIIC</b>              | Benzel type I<br>Mechanism: flexion with axial load        | Anterior translation of C2 on C3 with quadrangular fragment                                                       |
